# Supplementary material
Source: publisher figshare collection journal article supplement (https://sage.figshare.com/ndownloader/files/18109787)
Supplement: Supplementary file 1 [file 18109787]

**APPENDIX B**

Sample Counts by Country in Literature Review

| Country(ies) | Number of Studies | Country(ies) | Number of Studies |
| --- | --- | --- | --- |
| N/A (review, theoretical) | 21 | New Zealand | 3 |
| Australia | 3 | Nigeria | 1 |
| Bangladesh | 1 | Norway | 2 |
| Canada | 7 | OECD countries | 1 |
| China | 1 | Poland | 1 |
| Congo | 1 | Russia | 3 |
| Cote d'Ivoire, Peru | 1 | Scotland | 1 |
| Denmark | 3 | Sweden | 5 |
| EU | 3 | Switzerland | 2 |
| Finland | 2 | Tanzania | 1 |
| France | 2 | The Netherlands | 6 |
| Germany | 5 | Uganda | 1 |
| Ghana | 2 | UK | 17 |
| Greece | 1 | UK, New Zealand | 2 |
| India | 2 | UK, The Netherlands | 1 |
| Indonesia | 2 | US | 69 |
| Italy | 2 | US, Canada | 1 |
| Japan | 2 | US, Canada, Latin America, Australia | 1 |
| Japan and Korea | 1 | US, UK | 2 |
| Kenya, Uganda, Tanzania, & Senegal | 1 | Yugoslavia | 1 |
| Mexico | 1 |  |  |
